# Supplementary material
Source: PubMed Central journal article supplement (PMC2629290)
Supplement: 0809408105_0809408105SI.pdf [file 0809408105_0809408105SI.pdf]

# Supporting Information

Held *et al.* 10.1073/pnas.0809408105

## SI Methods

**Plant Growth Conditions—*Hordeum vulgare* cv.** Black Hulless plants were grown 5–7 d in BM-7 soil (Berger), supplemented with Osmocote (Scotts) 14-14-14 slow release fertilizer (1.8 g/L), Marathon (Olympic) granular insecticide (1 g/L), and Turface (MVP) (25%, vol/vol), in a Conviron PGR15 growth chamber under high intensity discharge lamps (450–700  $\mu\text{mol m}^{-2} \text{sec}^{-1}$ ) programmed for a 16-h photoperiod (25 °C day temp, 20 °C night temp). Lengths of the second and third leaf of 10 plants were measured from soil surface to leaf tip before harvest. Coleoptiles were from caryopses soaked and germinated in wet filter paper and incubated 2.5 d in darkness, as described earlier (1). Third leaves from  $\geq 10$  plants were pooled and collected into liquid nitrogen at daily intervals; 10–15-d after germination. These time points coincide with third leaf blade elongation from blade emergence from the sheath 10 d after germination to cessation of elongation 15 d after germination.

**Analysis of Developing Barley Third Leaves.** Barley seeds were preincubated to coleoptile stage and then sown in soil and grown as described above. The pooled leaf material was pulverized in liquid nitrogen from which total RNA was prepared in triplicate for each time point by using TriZol (Invitrogen). Time course RNA was used for strand-specific PCR (1  $\mu\text{g}$  per time point), real-time PCR, and ribonuclease protection assays as described below. Cell walls were prepared from the remaining pulverized leaf tissue (2). Cellulose biosynthesis in developing barley third leaves was estimated by weight remaining after acetic-nitric hydrolysis of the purified cell walls.  $\beta$ -Glucan in the cell walls of the developing barley third-leaf tissues was quantified by HPAEC (described below) by comparison with control digests of authentic barley (1  $\rightarrow$  3), (1  $\rightarrow$  4)- $\beta$ -D-glucan standards (Sigma).

**Extraction of RNA and First-Strand cDNA Synthesis.** Total barley RNA was extracted from 100–250 mg of leaf tissue by using TriZol reagent (Invitrogen) following the manufacturer's protocol, quantified by  $A_{260}$ , and assessed for quality by agarose gel electrophoresis. RNA from 2.5-d-old etiolated coleoptiles was similarly prepared. Before real-time PCR, genomic DNA contamination was removed from total RNA (10  $\mu\text{g}$ ) by Turbo DNA-free DNase treatment (Ambion). The RNA samples were again assayed for quality and quantity by agarose gel electrophoresis. First strand cDNA was synthesized from total RNA (1  $\mu\text{g}$  per reaction) by using iScript first strand cDNA synthesis kit (Bio-Rad) and subsequently diluted (1:5) with nuclease-free water.

**Detection of Antisense Transcripts by Strand-Specific RT-PCR.** First-strand cDNA was synthesized from 1.7  $\mu\text{g}$  total RNA extracted from late-expanded barley third leaves with the SuperScript III kit (Invitrogen), by using oligo dT as well as the gene specific primers: A6-sense-(l), 5'-CAA CGA GTT CGT CAT GAT CC-3'; A6-sense-(m), 5'-AAA ACC CGC ATG ATG AAG AG-3'; A6-sense-(s), 5'-CAA CAG CGG TTA CCA ATC CT-3'; A6-antisense-1, 5'-GAG ATG GAG GAT CAC CCA GA-3'; and A6-antisense-2, 5'-TGA AAG GGT CGA TCT TCA CC-3'. Control reactions lacking RT were also performed for all templates to ensure amplification was from the cDNA template.

First-strand cDNA synthesized by using the A6-sense-(s) strand-specific primer was subjected to PCR by using the primer pair A6-sense-(s), 5'-CAA CAG CGG TTA CCA ATC CT-3', and A6-antisense-2, 5'-TGA AAG GGT CGA TCT TCA CC-3'.

cDNA synthesized by using the A6-sense-(m) strand-specific primer was subjected to PCR by using the primer pair A6-sense-(m), 5'-AAA ACC CGC ATG ATG AAG AG-3', and A6-antisense-1, 5'-GAG ATG GAG GAT CAC CCA GA-3'. cDNA synthesized by using the A6-sense-(l) strand-specific primer was subjected to PCR by using the primer pair A6-sense-(l), 5'-CAA CGA GTT CGT CAT GAT CC-3', and A6-antisense-2, 5'-TGA AAG GGT CGA TCT TCA CC-3'. All primer pairs were used to amplify cDNA synthesized from oligo dT primers. PCRs (25  $\mu\text{l}$ ) assembled on ice contained 0.5- $\mu\text{l}$  dNTPs (10 mM each; Invitrogen), 1  $\mu\text{l}$  of each primer (10- $\mu\text{M}$  dilution), 1- $\mu\text{l}$  cDNA template, and 1 unit of GoTaq (Promega) in 1 $\times$  GoTaq green buffer (Promega). Cycling conditions included 2 min of activation at 95 °C, followed by 35 cycles of 95 °C for 30 s, 51 °C for 30 s, and 72 °C for 1 min. Equal volumes (16  $\mu\text{l}$ ) of PCR products were assessed by agarose gel electrophoresis.

**Detection of siRNAs by Ribonuclease Protection Assays (RPA).** Primers were designed for cloning a 465-bp fragment from the 3'-end of the *HvCesA6*-coding region by Primer 3 software (<http://fokker.wi.mit.edu/primer3/input.htm>; forward, 5'-GTG TTC AAG TGG ACC AGT CT-3' and reverse, 5'-GGG GCC AAT AAA TTT TAG AT-3'). The fragment was amplified by RT-PCR from cDNA prepared from barley third-leaf RNA. The PCR product was sequenced and then cloned into the pGEM-T easy vector kit (Promega).  $\alpha$ - $^{32}\text{P}$ -UTP (Amersham) radiolabeled probes were prepared from linearized plasmid templates having 5' overhanging ends with either T7 or SP6 RNA polymerase by using the MAXIscript Kit (Ambion) to produce the *HvCesA6* antisense riboprobe (522 nt) and the *HvCesA6* sense riboprobe (214 nt), respectively. A portion of the *HvCesA6* sense riboprobe was derived from the *pGEM-T easy* vector, therefore a short *Vector* sense probe (99 nt) was similarly prepared as a negative control. Riboprobes for the detection of siRNAs derived from the 5' portion of the *HvCesA6* gene, *HvGT-8A*, and *HvGT-8D* genes were generated similarly by using primers: A6-240 forward, 5'-ATG GCG GCC AAC CGG GGG ATG G-3'; A6-240 reverse, 5'-GAC CCC ATC CTT GCG CTC GTA CTC-3'; GT-8A-698 forward, 5'-TGA ATG GTG GTG AGC AGA AG-3'; 8A-698 reverse, 5'-GTG GAA CAG CAA GCT CAC AA-3'; 8D-869 forward, 5'-GCA AGG CCA CTA TCC ATG TT-3'; and 8D-869 reverse, 5'-CGA TGC TTG GGT TGT ATC CT-3', respectively.

Ribonuclease protection assays were performed by using the RPAIII kit (Ambion). Labeled riboprobes were gel-purified by 5% PAGE containing 8 M Urea in 1 $\times$  TBE buffer according to kit instructions and hybridized with 10–20  $\mu\text{g}$  total RNA from either barley, yeast, or mouse for 16–18 h at 42 °C. Reaction mixtures were digested with RNase A/T1 (1:100) for 30 min at 37 °C, then stopped with inactivation buffer (Ambion) and protected fragments were precipitated by using 10  $\mu\text{g}$  yeast RNA as a carrier. The protected fragments were separated by 12.5% PAGE containing 8 M Urea in 1 $\times$  TBE buffer.  $\gamma$ - $^{32}\text{P}$ ATP (Amersham) end-labeled Decade Marker (Ambion), prepared according to manufacturer's protocol, served as size standards. The protected *HvCesA6* nat-siRNAs were reproduced across  $\geq 3$  independent protection assays.

**Measurement of Gene Expression by Quantitative Real-Time PCR.** With the exception of *CsIF* and *CesA*, primer sets were designed within consensus regions to measure the expression of as many gene family members as possible in uninfected and VIGS-treated

plants (Table S5). *CsIF* expression was measured by using primers specific for the *HvCsIF6* gene (Table S5; ref 3), and *CesA* gene expression was measured by using either the *CesA-CR2* cloning primers (listed above) for *BSMV/CesA-CR1-PDS* and *BSMV/CesA-6-PDS* VIGS plants or primers specific for the *HvCesA6* gene in *BSMV/CesA-CR2-PDS* VIGS plants (Table S5). Reactions (25  $\mu$ l) consisted of 2.5  $\mu$ l of diluted cDNA template (25 ng), 0.25  $\mu$ l of each 10  $\mu$ M forward and reverse primer (100 nM), and 12.5  $\mu$ l of (2 $\times$ ) iTaq SYBR reagent kit (Bio-Rad). Technical replicates were performed in quadruplicate. Standard curves covering 3 orders of magnitude, and notemplate controls were performed in triplicate for each primer set. Relative gene expression of VIGS plants and controls from 3–5 separate third leaf samples was assessed by quantitative real-time PCR by using *ubiquitin10* expression as the normalizing target and *BSMV/V-PDS* (*BSMV/PDS4as*) as a calibrator (4). *Ubiquitin 10* was selected as the best normalizing target after a systematic survey of 4 housekeeping gene candidates (data not shown, primers are listed in Table S5). Numerous independent experiments were performed and the data presented represent typical values obtained across experiments. Reactions were performed on an MX3000P thermocycler (Stratagene). Cycling conditions included 2 min of activation at 95  $^{\circ}$ C, followed by 40–45 cycles of 95  $^{\circ}$ C for 15 s, 52  $^{\circ}$ C for 30 s, and 72  $^{\circ}$ C for 30 s followed by a dissociation curve cycle of 95  $^{\circ}$ C for 1 min, 52  $^{\circ}$ C for 30 s, then 95  $^{\circ}$ C for 30 s.

**Design and Construction of BSMV Vectors for CesA/CsIF VIGS.** Targets for the suppression of the barley (*Hordeum vulgare*) *HvCesA* gene family, the *HvCsIH* gene family, and the *HvCsIF* gene family were first designed by aligning full-length rice cDNA sequences of each gene family member by using Clustal W (5). VIGS targets were selected on the basis that they possessed at least 85% nucleotide similarity, contained at least one 21-nt stretch of 100% nucleotide identity toward prospective targets, and that they did not meet these criteria with other nontarget genes, especially not the other *CsIs* genes. A portion of the “Class-Specific Region” (CSR) was selected as a VIGS fragment to target the *HvCesA6* gene as a single isoform. The CSR of this *CesA* was selected as the target, because this region is unique to each *CesA* gene (6). Potential VIGS target sequences garnered from rice were then aligned with available barley *CesA* and *CsI* EST sequences to identify the homologous regions, verify desired specificity, and design primers for cloning.

Amplification of the VIGS-targeting fragments by reverse transcriptase PCR of total barley RNA was performed by using the following primers: *CsIH* (148 bp) forward, 5'-GAC ATT TTG ACC GGA CAA CGG; A-3' reverse, 5'-TCT CCA GAA CCC CTG TTG CCA T-3'; *CsIF* (170 bp) forward, 5'-GTT CGC GCT CGG GAT AAT; reverse, 5'-ATG CAG CAT TAC TTG ACA AA-3'; *CesA-CR1* (110 bp) forward, 5'-TGG TGA TGT CTT TGT CGC CT, reverse, 5'-GAA CTC GGG GGC TAC CTT TGA; *CesA-CR2* (187 bp) forward, 5'-CCC TAG GGA CCA TCC TGG-3'; reverse, 5'-GGC ACC ATT TGT CAA CAC-3'; *CesA-6* (200 bp) forward, 5'-TGT ATG GCT ATG ATC CTG TAT TAA CTG AG-3'; and reverse, 5'-CCT TTC ATC CTC ATA ACC TTC TAT ACC C-3'. PCR products were cloned bidirectionally into the pGEM T-easy vector (Promega). Plasmids were sequenced, and VIGS targets were then subcloned into plasmids harboring the  $\gamma$ -portion of the BSMV genome (designated pBSMV- $\gamma$ ) bidirectionally as a *NotI* fragment (7, 8). The inserts were sequenced, and plasmids having a *CsIH* fragment in the antisense orientation (designated pBSMV- $\gamma$ -*CsIH-as*), a *CsIF* fragment in the sense orientation (designated pBSMV- $\gamma$ -*CsIFs*), a *CesA* fragment in the sense orientation (designated pBSMV- $\gamma$ -*CesA-CR1-s*), another *CesA* fragment in the sense orientation (designated pBSMV- $\gamma$ -*CesA-CR2-s*), and a *CesA6* fragment in the antisense orientation (designated

pBSMV- $\gamma$ -*CesA-6-as*) were used as templates for in vitro transcription and subsequent plant inoculations.

For in vitro transcription of VIGS plasmids, capped viral RNAs were prepared from linearized plasmids (1  $\mu$ g per reaction) by using the mMessage mMachine T7 in vitro transcription kit (Ambion). Plasmid linearization and in vitro transcription was monitored by agarose gel electrophoresis.

**Viral Inoculation of Barley Plants.** Plant inoculations were carried out as described previously (7, 8). Briefly, in vitro transcripts of the pBSMV/ $\alpha$ , pBSMV/ $\beta$ , pBSMV/ $\gamma$ -*PDSas*, and the appropriate experimental gene silencing construct (either *BSMV/ $\gamma$* , *BSMV/ $\gamma$ -*CsIH-as**, *BSMV/ $\gamma$ -*CsIF-s**, *BSMV/ $\gamma$ -*CesA-CR1-s**, *BSMV/ $\gamma$ -*CesA-CR2-s**, or *BSMV/ $\gamma$ -*CesA-6-as**) were combined in a 1:1:0.5:0.5 ratio by volume, respectively. For plant inoculations, 3  $\mu$ l of the mixture of  $\alpha$ ,  $\beta$ ,  $\gamma$ -PDS, and respective  $\gamma$ -RNA transcripts were added to 22.5  $\mu$ l of FES and applied to 6–7-day-old seedlings by rub-inoculating the first leaf of each plant 2–3 times. The  $\gamma$ -*PDSas* transcripts were coinoculated with all plants to serve as a visual marker for gene silencing. Infected plants were grown under the same conditions until viral symptoms were visually evident in the third leaves, typically 6–7 d later.

**In vivo Labeling of VIGS Barley with [U- $^{14}$ C]-Glucose and Cell Wall Characterization.** Young, expanding third leaves of plants (3–5 each) infected with either *BSMV/V-PDS* alone, *BSMV/CesA-CR1-PDS*, *BSMV/CesA-CR2-PDS*, *BSMV/CesA-6-PDS*, *BSMV/CsIH-PDS*, or *BSMV/CsIF-PDS* were harvested under 0.01% (vol/vol) Tween 20 (aq) and pulse labeled in vivo with D-[U- $^{14}$ C]-glucose (Amersham Pharmacia) for 2–3 h at ambient temp under fluorescent lights. Labeled leaf tissue was collected into liquid nitrogen from which cell walls were prepared as described earlier (2).

**Isoxaben and DCB Treatment and In Vivo Labeling With  $^{14}$ CO $_2$  (g).** Barley seedlings were grown 11 d in a growth chamber, as described above, in autoclaved Redi-earth (Sun Gro) potting soil. Twelve plants each were sprayed ( $\approx$ 5 ml/plant) with 0.1% (vol/vol) Tween 20 (aq), and 0.1% (vol/vol) DMSO containing no inhibitor (mock), 1  $\mu$ M isoxaben or 100  $\mu$ M DCB. Plants were incubated under fluorescent lights for 3–6 h at ambient temp. Plants were pulse-labeled with  $^{14}$ CO $_2$ , liberated by adding a few drops of 1 M H $_2$ SO $_4$  to a dish containing 10  $\mu$ Ci per plant of NaH $^{14}$ CO $_3$  (aq) (2.04 GBq mmol $^{-1}$ ; MP Biomedicals) in a sealed Plexiglas chamber. The plants were incubated in the presence of the radiolabel under fluorescent lighting for 1 h. The third leaves for each treatment were pooled and harvested into liquid nitrogen. Cell walls and total RNA were prepared as described above.

**Cellulose Determination.** The ability to incorporate radiolabeled carbon into cellulose was assayed by acetic-nitric hydrolysis (9). Briefly, isolated cell walls (2) were hydrolyzed in acetic acid, nitric acid, and water (8:1:2, vol/vol/vol) at 100  $^{\circ}$ C for 90 min. Samples were centrifuged at 2,500  $\times$  g for 5 min and the supernatant was removed. Pellets containing pure cellulose were washed with water, then acetone, and then briefly dried. Pulse-labeled cellulose pellets were dissolved in 11.9 M sulfuric acid (aq) for 1 h at ambient temp. Neutralized aliquots of the supernatant and soluble pellet were then assayed for radioactivity. The ability to incorporate label into cellulose in these plants was expressed as the percentage of insoluble radioactivity to the total radioactivity in the isolated walls.

**(1  $\rightarrow$  3),(1  $\rightarrow$  4)- $\beta$ -Glucan Profile Determination.** The  $^{14}$ C-labeled VIGS cell walls were digested at 37  $^{\circ}$ C for 3 h with *B. subtilis* (1  $\rightarrow$  4) endo- $\beta$ -D-glucanase, which specifically cleaves a

$\beta$ -(1  $\rightarrow$  4)-linkage, only if it is preceded by a  $\beta$ -(1  $\rightarrow$  3) linkage (10), as described previously (11). The reactions were stopped by boiling for 5 min then centrifuged at  $10,000 \times g$  for 10 min. Radioactivity in the pellet was recorded by scintillation counting. (1  $\rightarrow$  3),(1  $\rightarrow$  4)- $\beta$ -D-Glucan oligosaccharides released into the supernatant were separated by HPAEC-PAD (11). Fractions

were collected at 0.5–1 min intervals, neutralized, and assayed for radioactivity. The ability to incorporate label into (1  $\rightarrow$  3),(1  $\rightarrow$  4)- $\beta$ -glucan was expressed as the ratio of the sum of the radioactivity possessed by the cellotriose and cellotetraose  $\beta$ -glucan oligomers to the total radioactivity (oligomers plus pellet).

1. Gibeaut D, Pauly M, Bacic A, Fincher GB (2005) Changes in cell wall polysaccharides in developing barley (*Hordeum vulgare*) coleoptiles. *Planta* 221:729–738.
2. McCann MC, et al. (2007) Neural network analyses of infrared spectra for classifying cell wall architectures. *Plant Physiol* 143:1314–1326.
3. Burton RA, Shirley NJ, King BJ, Harvey AJ, Fincher GB (2004) The CesA gene family of barley. Quantitative analysis of transcripts reveals two groups of coexpressed genes. *Plant Physiol* 134:224–236.
4. Pfaffl MW (2001) A new mathematical model for relative quantification in real-time RT-PCR. *Nucl Acids Res* 29:2002–2007.
5. Chenna R, et al. (2003) Multiple sequence alignment with the Clustal series of programs. *Nucl Acids Res* 31:3497–3500.
6. Vergara CE, Carpita NC (2001)  $\beta$ -D-glycan synthases and the CesA gene family: Lessons to be learned from the mixed-linkage (1  $\rightarrow$  3),(1  $\rightarrow$  4)- $\beta$ -D-glucan synthase. *Plant Mol Biol* 47:145–160.
7. Holzberg S, Brosio P, Gross C, Pogue GP (2002) Barley stripe mosaic virus-induced gene silencing in a monocot plant. *Plant J* 30:315–327.
8. Scofield SR, Huang L, Brandt AS, Gill BS (2005) Development of a virus-induced gene-silencing system for hexaploid wheat and its use in functional analysis of the Lr21-mediated leaf rust resistance pathway. *Plant Physiol* 138:2165–2173.
9. Updegraff D (1969) Semimicro determination of cellulose in biological materials. *Anal Biochem* 32:420–424.
10. Anderson MA, Stone BA (1975) A new substrate for investigating the specificity of  $\beta$ -glucan hydrolases. *FEBS Lett* 52:202–207.
11. Urbanowicz BR, Rayon C, Carpita NC (2004) Topology of the maize mixed linkage (1  $\rightarrow$  3),(1  $\rightarrow$  4)- $\beta$ -D-glucan synthase at the Golgi membrane. *Plant Physiol* 134:758–768.

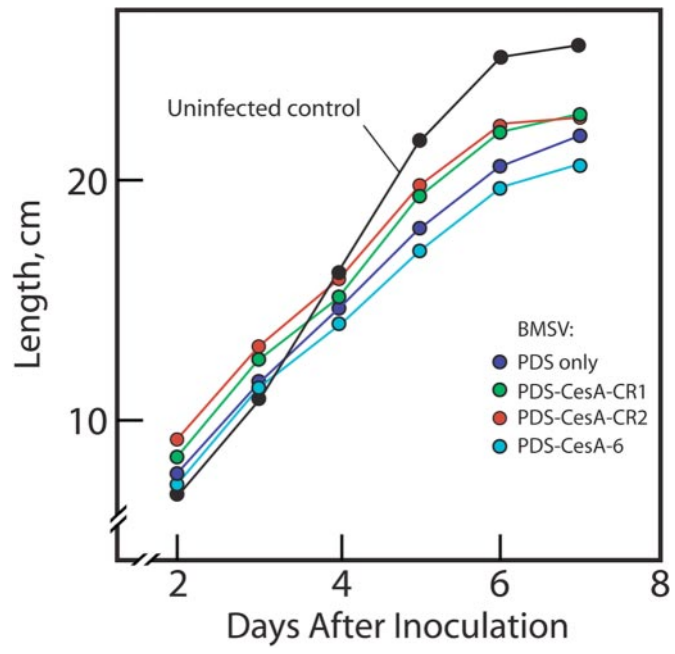

**Fig. S1.** Comparison of leaf lengths after inoculation with BSMV/PDS alone or BSMV/PDS and CesA VIGS constructs. Second leaf lengths (cm) were recorded at daily intervals from 10 plants after inoculation with respective VIGS constructs. Data are represented as the average lengths of 10 biological replicates.

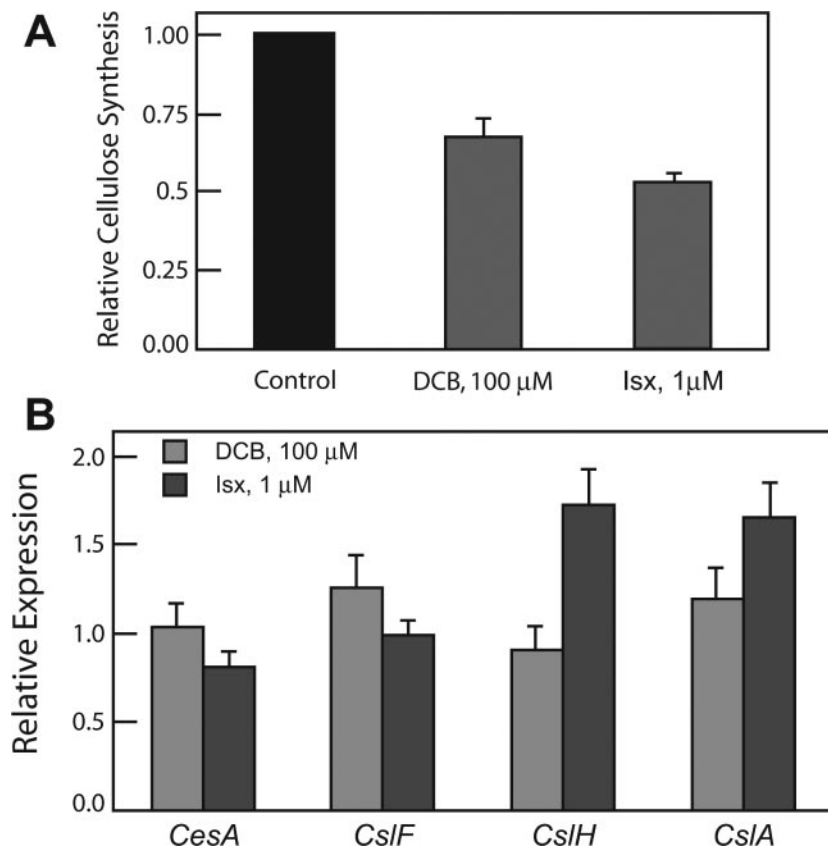

**Fig. 52.** Barley third leaves treated with chemical inhibitors of cellulose biosynthesis do not exhibit the same gene response as VIGS treatment. Barley third leaves were treated with either 100  $\mu$ M DCB or 1  $\mu$ M isoxaben (Isx), and compared with control plants sprayed with buffer containing no inhibitor. (A) Cellulose determinations and (B) comparative quantitative PCR data were collected from 10–12 pooled biological replicates. Values are the mean  $\pm$  SD relative to plants infected with empty vector-PDS control plants (BSMV/PDS expression = 1) and normalized to *ubiquitin10* gene expression.



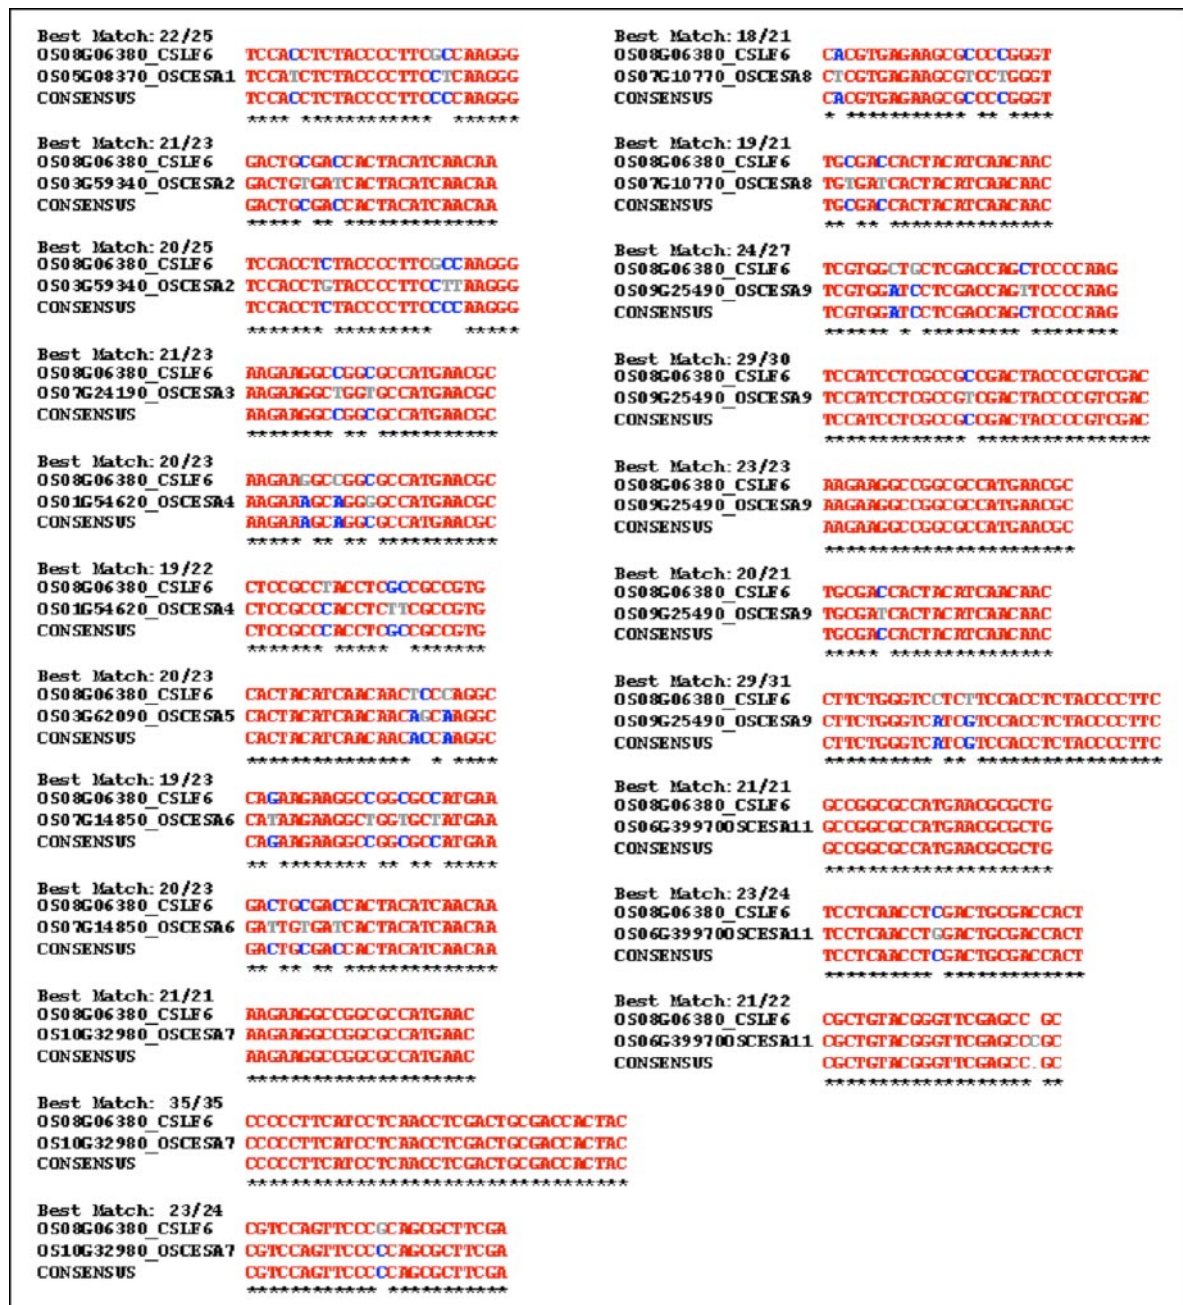

Fig. S3. Alignment of *OsCsF6* (Os08g06380) with *OsCesA* gene superfamily members. A rice glucan synthase gene *OsCsF6* shares short regions of high complementarity with nearly all *CesA* genes in rice.

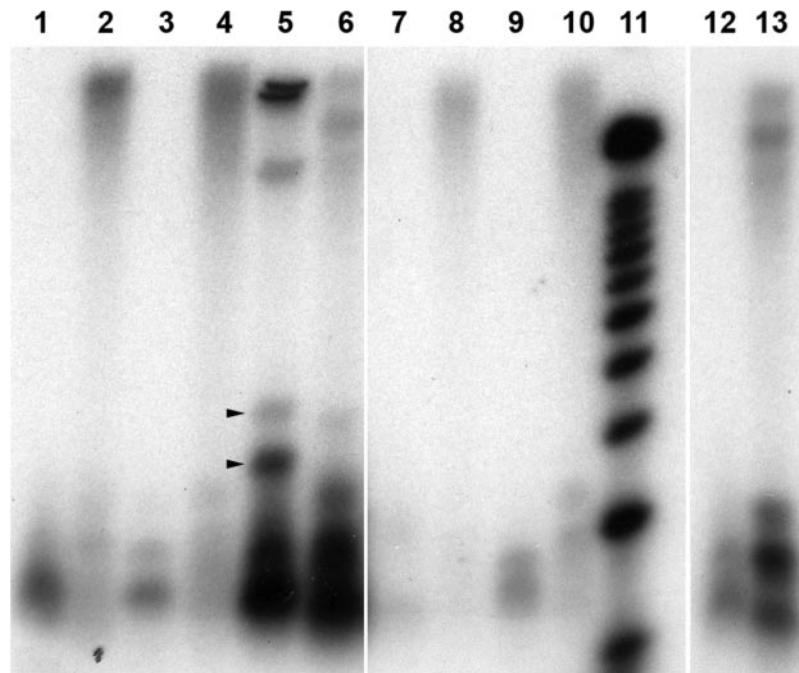

**Fig. 54.** Ribonuclease protection assays for *GT8* and *HvCesA6* upstream small RNAs. Lanes: 1, *Hv* RNA (10  $\mu$ g) probed with *GT8A*-sense probe; 2, *Hv* RNA (10  $\mu$ g) probed with *GT8A*-antisense probe; 3, *Hv* RNA (10  $\mu$ g) probed with *GT8D*-sense probe; 4, *Hv* RNA (10  $\mu$ g) probed with *GT8D*-antisense probe; 5, *Hv* RNA (10  $\mu$ g) probed with *A6* upstream-sense probe; 6, *Hv* RNA (10  $\mu$ g) probed with *A6* upstream-antisense probe; 7, yeast RNA (10  $\mu$ g) probed with *GT8A*sense probe; 8, yeast RNA (10  $\mu$ g) probed with *GT8A*-antisense probe; 9, yeast RNA (10  $\mu$ g) probed with *GT8D*-sense probe; 10, yeast RNA (10  $\mu$ g) probed with *GT8D*-antisense probe; 11, decade markers; 12, yeast RNA (10  $\mu$ g) probed with *A6* upstream-sense probe; and 13, yeast RNA (10  $\mu$ g) probed with *A6* upstream antisense probe. Arrowheads mark the 24-nt and 30-nt fragments in lane 5.

**Table S1. Potential cis-NAT pairs and antisense sequences for Arabidopsis CesA genes**

| Name                                         | Gene              | Overlapping AS gene from TAIR*           | No. AS tags, total/unique† | Genes hit for nonunique AS tags†                                                  |
|----------------------------------------------|-------------------|------------------------------------------|----------------------------|-----------------------------------------------------------------------------------|
| <i>CesA1</i> ( <i>RSW1</i> )                 | <b>At4 g32410</b> | At4 g32400 (sodium hypersensitive) close | 12/9                       | <b>At2 g25540 (CesA10)</b>                                                        |
| <i>CesA2</i>                                 | <b>At4 g39350</b> |                                          | 6/5                        | At2 g23790 (transcription factor), <b>At5 g64740 (CesA6)</b>                      |
| <i>CesA3</i> ( <i>ELI1</i> ) ( <i>CEV1</i> ) | At5 g05170        | At5 g05160 (LRR) close                   | 9/8                        | At4 g14800 (20 s proteasome $\beta$ subunit 2)                                    |
| <i>CesA4</i> ( <i>IRX5</i> )                 | At5 g44030        | At5 g44040 (unknown)                     | 5/4                        | At4 g35800 (RNA Pol2 LS), 1 sense small RNA                                       |
| <i>CesA5</i>                                 | <b>At5 g09870</b> |                                          | 4/3                        | <b>At3 g03050 (CslD3)</b> , <b>At5 g64740 (CesA6)</b>                             |
| <i>CesA6</i> ( <i>PRC1</i> )                 | <b>At5 g64740</b> |                                          | 12/11                      | <b>At5 g09870 (CesA5)</b> , <b>At4 g39350 (CesA2)</b> , <b>At3 g03050 (CslD3)</b> |
| <i>CesA7</i> ( <i>IRX3</i> )                 | At5 g17420        | At5 g17410 (tubulin family)              | 3/3                        |                                                                                   |
| <i>CesA8</i> ( <i>IRX1</i> )                 | At4 g18780        | At4 g18770 (MYB98)                       | 3/1                        | At3 g54340 (Apetala3); AT4 g28600 (no pollen germination related)                 |
| <i>CesA9</i>                                 | At2 g21770        |                                          | 1/0                        | At1 g76190 (auxin response), At1 g36150 (lipid transfer protein)                  |
| <i>CesA10</i>                                | <b>At2 g25540</b> | At2 g25530 (ATPase-like) close           | 3/0                        | <b>At4 g32410 (CesA1)</b>                                                         |

Bold text indicates  $\geq 2$  cell wall genes share antisense sequences.

\*From the TAIR database (<http://www.arabidopsis.org>).

†From the MPSS database (<http://mpss.udel.edu/>).



**Table S2. Potential cis-NAT pairs and antisense sequences for rice Cesa genes**

| Name   | Gene               | Overlapping gene*                  | No. AS tags,<br>total/unique <sup>†</sup> | Genes hit for nonunique AS tags <sup>†</sup>                                               |
|--------|--------------------|------------------------------------|-------------------------------------------|--------------------------------------------------------------------------------------------|
| CesA11 | Os06 g39970        |                                    | 1/1                                       |                                                                                            |
| CesA4  | Os01 g54620        |                                    | 17/17                                     |                                                                                            |
| CesA2  | <b>Os03 g59340</b> | Os03 g59330<br>(polygalacturonase) | 8/2                                       | <b>Os07 g10770 × 3 (CesA8)</b> , Os05 g35630 (hypothetical), Os01 g05170 (expressed)       |
| CesA8  | <b>Os07 g10770</b> |                                    | 19/10                                     | <b>Os03 g59340 x3 (CesA2)</b> , <b>Os05 g08370 x2 (CesA1)</b> , Os05 g35630 (hypothetical) |
| CesA1  | <b>Os05 g08370</b> |                                    | 14/0                                      | <b>Os07 g10770 x2 (CesA8)</b>                                                              |
| CesA3  | <b>Os07 g24190</b> |                                    | 16/12                                     | <b>Os03 g62090 x2 (CesA5)</b> , Os02 g05670 (expressed)                                    |
| CesA5  | <b>Os03 g62090</b> |                                    | 13/11                                     | <b>Os07 g24190 x2 (CesA3)</b>                                                              |
| CesA6  | Os07 g14850        |                                    | 8/6                                       | Os05 g40820 (60 s ribosomal)                                                               |
| CesA9  | Os09 g25490        |                                    | 11/11                                     |                                                                                            |
| CesA7  | Os10 g32980        |                                    | 11/10                                     | Os04 g08240 (hypothetical)                                                                 |

Bold text indicates  $\geq 2$  cell wall genes share antisense sequences.

\*From the TIGR database (<http://rice.plantbiology.msu.edu/>).

<sup>†</sup>From the MPSS database (<http://mpss.udel.edu/>).

**Table S3. Summary of MPSS tags and potential antisense sequences for Csl and GT8 gene families of Arabidopsis**

| Family                | Gene              | Overlapping AS gene from TAIR*                     | No. AS tags, total/unique <sup>†</sup> | Other genes targeted by shared AS tags <sup>†</sup>                                                                                                    |
|-----------------------|-------------------|----------------------------------------------------|----------------------------------------|--------------------------------------------------------------------------------------------------------------------------------------------------------|
| CslA1                 | At4 g16590        |                                                    | 4/3                                    | Chr4, no gene                                                                                                                                          |
| CslA2                 | At5 g22740        |                                                    | 6/6                                    |                                                                                                                                                        |
| CslA3                 | At1 g23480        |                                                    | 1/1                                    |                                                                                                                                                        |
| CslA7                 | At2 g35650        |                                                    | 0/0                                    |                                                                                                                                                        |
| CslA9                 | At5 g03760        | At5 g03750 (C3HC4 RING finger) close               | 2/2                                    |                                                                                                                                                        |
| CslA10                | At1 g24070        |                                                    | 0/0                                    |                                                                                                                                                        |
| CslA11                | At5 g16190        | At5 g16180 (chloroplast splicing factor) close     | 1/1                                    |                                                                                                                                                        |
| CslA14                | At3 g56000        | At3 g55990 (Eskimo1) close                         | 0/0                                    |                                                                                                                                                        |
| CslA15                | At4 g13410        |                                                    | 1/1                                    |                                                                                                                                                        |
| CslB3                 | At2 g32530        |                                                    | 0/0                                    |                                                                                                                                                        |
| CslB4                 | At2 g32540        |                                                    | 0/0                                    |                                                                                                                                                        |
| CslB1                 | At2 g32610        |                                                    | 0/0                                    |                                                                                                                                                        |
| CslB2                 | At2 g32620        |                                                    | 0/0                                    |                                                                                                                                                        |
| CslB5                 | At4 g15290        | At4 g15280 (UDP-glucuronosyl/glucosyl transferase) | 1/1                                    |                                                                                                                                                        |
| CslB6                 | At4 g15320        |                                                    | 0/0                                    |                                                                                                                                                        |
| CslC4                 | At3 g28180        |                                                    | 4/3                                    | At4 g26520 (fructose bisphosphate aldolase)                                                                                                            |
| CslC5                 | At4 g31590        |                                                    | 1/1                                    |                                                                                                                                                        |
| CslC6                 | At3 g07330        |                                                    | 4/4                                    |                                                                                                                                                        |
| CslC8                 | At2 g24630        |                                                    | 1/1                                    |                                                                                                                                                        |
| CslC12                | At4 g07960        |                                                    | 2/2                                    |                                                                                                                                                        |
| CslD1                 | At2 g33100        |                                                    | 0/0                                    |                                                                                                                                                        |
| CslD3                 | <b>At3 g03050</b> |                                                    | 3/2                                    | <b>At5 g09870 (CesA5), At5 g64740 (CesA6)</b>                                                                                                          |
| CslD4                 | At4 g38190        |                                                    | 1/0                                    | At4 g06692 (gypsy retrotransposon)                                                                                                                     |
| CslD5                 | <b>At1 g02730</b> | <b>At1 g02720 (GATL5) close</b>                    | 6/4                                    | Chr 1, no gene                                                                                                                                         |
| CslD6                 | At1 g32180        |                                                    | 2/2                                    |                                                                                                                                                        |
| CslE1                 | At1 g55850        | At1 g55860 (Ubiquitin-protein ligase 1)            | 2/2                                    |                                                                                                                                                        |
| CslG3                 | <b>At4 g23990</b> |                                                    | 2/1                                    | <b>At4 g2400 (CslG2), At4 g24010 (CslG1)</b>                                                                                                           |
| CslG2                 | <b>At4 g24000</b> |                                                    | 3/1                                    | <b>At4 g23990 (CslG3), At4 g24010 (CslG1), DNA Mariner (retro element?)</b>                                                                            |
| CslG1                 | <b>At4 g24010</b> | At4 g24015 (RING-H2 zinc finger)                   | 2/1                                    | <b>At4 g2400 (CslG2), At4 g23990 (CslG3)</b>                                                                                                           |
| GT8-A                 | At1 g08990        | none                                               | 0/0                                    |                                                                                                                                                        |
| GT8-A                 | At1 g54940        | none                                               | 0/0                                    |                                                                                                                                                        |
| GT8-A                 | At4 g33330        | none                                               | 1/1                                    |                                                                                                                                                        |
| GT8-A                 | At1 g77130        | none                                               | 1/1                                    |                                                                                                                                                        |
| GT8-A (PGS1P1)        | At3 g18660        | none                                               | 0/0                                    |                                                                                                                                                        |
| GT8-B (GolS3)         | At1 g09350        | none                                               | 1/1                                    |                                                                                                                                                        |
| GT8-B (GolS2)         | At1 g56600        | none                                               | 0/0                                    |                                                                                                                                                        |
| GT8-B (GolS1)         | At2 g47180        | At2 g47170 (ADP-ribosylation factor)               | 2/2                                    |                                                                                                                                                        |
| GT8-B                 | At1 g60450        | none                                               | 0/0                                    |                                                                                                                                                        |
| GT8-B                 | At1 g60470        | At1 g60460 (unknown)                               | 1/0                                    | At5 g08620 (stress response suppressor 2)                                                                                                              |
| GT8-B                 | At4 g26250        | none                                               | 0/0                                    |                                                                                                                                                        |
| GT8-B                 | <b>At5 g23790</b> | none                                               | 0/0                                    |                                                                                                                                                        |
| GT8-B                 | At5 g30500        | none                                               | 0/0                                    |                                                                                                                                                        |
| GT8-C (GATL5)         | <b>At1 g02720</b> | <b>At1 g02730 close (CslD5)</b>                    | 2/2                                    |                                                                                                                                                        |
| GT8-C (GATL6)         | At4 g02130        | At4 g02120 (CTP synthase) close                    | 2/2                                    |                                                                                                                                                        |
| GT8-C (GATL7)         | <b>At3 g62660</b> | none                                               | 4/3                                    | <b>At1 g24170 (GATL8)</b>                                                                                                                              |
| GT8-C (GATL8)         | <b>At1 g24170</b> | none                                               | 3/1                                    | <b>At3 g62660 (GATL7); At1 g70090 (GATL9)</b>                                                                                                          |
| GT8-C (GATL9)         | <b>At1 g70090</b> | none                                               | 3/2                                    | <b>At1 g24170 (GATL8)</b>                                                                                                                              |
| GT8-C (GATL3)         | At1 g13250        | none                                               | 1/1                                    |                                                                                                                                                        |
| GT8-C (GATL4)         | At3 g06260        | none                                               | 1/1                                    |                                                                                                                                                        |
| GT8-C (GATL1, Parvis) | At1 g19300        | none                                               | 1/1                                    |                                                                                                                                                        |
| GT8-C (GATL2)         | At3 g50760        | none                                               | 1/1                                    |                                                                                                                                                        |
| GT8-C (GATL10)        | At3 g28340        | none                                               | 2/2                                    |                                                                                                                                                        |
| GT8-D (GAUT13)        | At3 g01040        | none                                               | 3/3                                    |                                                                                                                                                        |
| GT8-D (GAUT14)        | At5 g15470        | none                                               | 2/2                                    |                                                                                                                                                        |
| GT8-D (GAUT12)        | At5 g54690        | At5 g54680 (IAA-Leucine Resistant3)                | 0/0                                    |                                                                                                                                                        |
| GT8-D (GAUT15)        | <b>At3 g58790</b> | <b>At3 g58795 (5' Natural Antisense)</b>           | 3/1                                    | <b>At3 g25140 (Gaut8/QUA1); At1 g01080 (RNA binding), At3 g09980 (unknown), At4 g39750 (F-box protein), At5 g11390 (unknown), At5 g03660 (unknown)</b> |
| GT8-D (GAUT2)         | At2 g46480        | none                                               | 0/0                                    |                                                                                                                                                        |

| Family              | Gene              | Overlapping AS gene from TAIR*                | No. AS tags, total/unique <sup>†</sup> | Other genes targeted by shared AS tags <sup>†</sup> |
|---------------------|-------------------|-----------------------------------------------|----------------------------------------|-----------------------------------------------------|
| GT8-D (GAUT1)       | At3 g61130        | none                                          | 5/5                                    |                                                     |
| GT8-D (GAUT3)       | At4 g38270        | At4 g38260 (in 5' unknown)                    | 0/0                                    |                                                     |
| GT8-D (GAUT4)       | At5 g47780        | none                                          | 3/3                                    |                                                     |
| GT8-D (GAUT9)       | At3 g02350        | none                                          | 2/2                                    |                                                     |
| GT8-D (GAUT8, Qua1) | <b>At3 g25140</b> | At3 g25150 close (nuclear transport factor 2) | 5/4                                    | <b>At3 g58790 (GAUT15)</b>                          |
| GT8-D (GAUT11)      | At1 g18580        | none                                          | 0/0                                    |                                                     |
| GT8-D (GAUT10)      | At2 g20810        | none                                          | 2/2                                    |                                                     |
| GT8-D (GAUT6)       | <b>At1 g06780</b> | none                                          | 2/2                                    |                                                     |
| GT8-D (GAUT5)       | <b>At2 g30575</b> | none                                          | 0/0                                    |                                                     |
| GT8-D (GAUT7)       | At2 g38650        | none                                          | 2/1                                    | At3 g49600 (ubiquitin specific protease 26)         |
| GT8-E               | At2 g35710        | none                                          | 1/1                                    |                                                     |
| GT8-E               | At4 g16600        | none                                          | 1/1                                    |                                                     |
| GT8-E               | At5 g18480        | none                                          | 4/3                                    | At3 g60150 (unknown)                                |

Bold text indicates  $\geq 2$  cell wall genes may share antisense sequences.

\*From the TAIR database (<http://www.arabidopsis.org>).

<sup>†</sup>From the MPSS database (<http://mpss.udel.edu/>).

**Table S4. A summary of MPSS tags and potential antisense genes for the rice Csl and GT8 cell wall-related gene families**

| Family             | TIGR gene name*                             | Antisense gene present                       | Distance   | MPSS,<br>total/unique <sup>†</sup> | Genes MPSS tags hit <sup>†</sup>                                                                                                                                                                                                         |
|--------------------|---------------------------------------------|----------------------------------------------|------------|------------------------------------|------------------------------------------------------------------------------------------------------------------------------------------------------------------------------------------------------------------------------------------|
| CslA5              | <b>Os03G26050</b><br>( <b>Os03 g26044</b> ) | Os03 g26030 (expressed)                      | 0.9 kb     | 7/5                                | <b>Os03 g07350 (CslA4)</b> , Os09 g26770 (expressed), Os03 g62670 (methyl transferase), Os10 g39320 chloroplast nucleotide DNA binding)                                                                                                  |
| CslA6              | Os02 g51060                                 | Os02 g51050 (hypothetical)                   | 1.0 kb     | 7/7                                |                                                                                                                                                                                                                                          |
| CslA7              | Os07G43710                                  | Os97 g43720 (expressed)                      | 0.1 kb     | 2/2                                |                                                                                                                                                                                                                                          |
| CslA8              | Os09 g39920                                 | none                                         |            | 4/3                                | Os01 g40094 (phosphatase 2C ABI2), Os02 g43790 (ethylene responsive), Os03 g50740 (retrotransposon), Os07 g34260 (chalcone synthase), Os07 g47510 (stress related), Os10 g37850 (armadillo-repeat), Os12 g42610 (axial regulator YABBY2) |
| CslA9              | Os06G42020                                  | Os06 g42030 (potassium transporter)          | overlapped | 2/0                                | Os06 g42030 (potassium transporter)                                                                                                                                                                                                      |
| CslA11             | Os08G33740                                  | Os08 g33750 (MYR1)                           | 3.3 kb     | 10/10                              |                                                                                                                                                                                                                                          |
| CslC1              | Os01G56130                                  | Os01 g56120 (RNA recognition)                | 5.4 kb     | 8/8                                |                                                                                                                                                                                                                                          |
| CslC2              | Os09G25900                                  | Os09 g25890 (trehalose-6-phosphate synthase) | 10.2 kb    | 8/7                                | Os10 g33660 (charged multivesicular body)                                                                                                                                                                                                |
| CslC3              | Os08G15420                                  | Os08 g15430 (hypothetical)                   | 1.5 kb     | 4/3                                | over 130 genes                                                                                                                                                                                                                           |
| CslC7              | Os05G43530                                  | Os5 g43520 (BSD domain containing)           | 1.6 kb     | 8/7                                | Os06 g48300 (phosphatase 2C)                                                                                                                                                                                                             |
| CslC9              | Os03G56060                                  | Os03 g56050 (ANT-like)                       | 3.4 kb     | 8/8                                |                                                                                                                                                                                                                                          |
| CslC10             | Os07G03260                                  | Os07 g03250 (AINTEGUMENTA)                   | 1.0 kb     | 1/0                                | Os06 g01870 (expressed)                                                                                                                                                                                                                  |
| CslD1              | <b>Os10G42750</b>                           | Os10 g42754 (expressed)                      | 0.2 kb     | 8/6                                | Os02 g09480 (MYB transcription factor), <b>Os12 g36890 (CslD4)</b> , Os11 g29630 (expressed)                                                                                                                                             |
| CslD2              | Os06G02180                                  | Os06 g02170 (heat shock)                     | 1.1 kb     | 9/9                                |                                                                                                                                                                                                                                          |
| CslD3              | Os08G25710                                  | Os08 g25700 (expressed)                      | 0.1 kb     | 7/7                                |                                                                                                                                                                                                                                          |
| CslD4              | <b>Os12G36890</b>                           | Os12 g36880 (major pollen allergen)          | 1.6 kb     | 3/2                                | Os02 g09480 (MYB transcription factor), <b>Os10 g42750 (CslD1)</b>                                                                                                                                                                       |
| CslD5              | Os06G22980                                  | none                                         |            | 2/2                                |                                                                                                                                                                                                                                          |
| CslE1 <sup>+</sup> | Os09G30120                                  | Os09 g30100 (rRNA methyl transferase)        | 6.9 kb     | 6/6                                |                                                                                                                                                                                                                                          |
| CslE2              | Os02G49330<br>(Os02 g49332)                 | Os02 g49340 (nitrate induced NOI)            | 0.8 kb     | 11/8                               | Os01 g54040 (ATP peptidase), Os06 g07923 (expressed), Os06 g08023 (flavonol synthase), Os08 g32510 (hypothetical), Os10 g29514 (expressed), Os01 g48260 (hypothetical), Os12 g42284 (hypothetical)                                       |
| CslE6 <sup>+</sup> | Os09G30130                                  | Os09 g30100 (rRNA methyl transferase)        | 14.2 kb    | 3/3                                |                                                                                                                                                                                                                                          |
| CslF1              | Os07G36700                                  | Os07 g36710 (retrotransposon)                | 1.6 kb     | 0/0                                |                                                                                                                                                                                                                                          |
| CslF2              | Os07G36690                                  | none                                         |            | 2/2                                |                                                                                                                                                                                                                                          |
| CslF3              | Os07G36750                                  | none                                         |            | 1/1                                |                                                                                                                                                                                                                                          |
| CslF4              | Os07G36740                                  | Os07 g36720 (retrotransposon)                | 3.8 kb     | 0/0                                |                                                                                                                                                                                                                                          |
| CslF6              | Os08G06380                                  | Os08 g06370 (transcription factor)           | 8.7 kb     | 17/15                              | Os03 g33680 (retrotransposon), Os03 g51350 (expressed), Os11 g30230 (hypothetical)                                                                                                                                                       |
| CslF7              | Os10G20260                                  | none                                         |            | 5/4                                | Os05 g49290 (acyltransferase)                                                                                                                                                                                                            |
| CslF8              | <b>Os07G36630</b>                           | none                                         |            | 4/3                                | <b>Os07 g36610 (CslF9)</b>                                                                                                                                                                                                               |
| CslF9              | <b>Os07G36610</b>                           | none                                         |            | 6/4                                | <b>Os07 g36630 (CslF8)</b> , Os01 g62540 (hypothetical), Os10 g37590 (hypothetical)                                                                                                                                                      |
| CslH1              | Os10G20090                                  | none                                         |            | 9/8                                | Os02 g14870 (hypothetical)                                                                                                                                                                                                               |
| CslH2              | Os04G35020                                  | Os04 g35010 (DNA binding)                    | overlapped | 6/6                                |                                                                                                                                                                                                                                          |
| CslH3              | Os04G35030                                  | none                                         |            | 0/0                                |                                                                                                                                                                                                                                          |
| GT8A               | Os01 g65780                                 | Os01 g65790 (pectinesterase)                 | 4.3 kb     | 12/12                              |                                                                                                                                                                                                                                          |
| GT8A               | Os05 g35200                                 | Os05 g35190 (expressed)                      | 0.4 kb     | 6/6                                |                                                                                                                                                                                                                                          |
| GT8A               | Os02 g35020                                 | none                                         |            | 4/3                                | Os03 g58640 (FHA domain containing)                                                                                                                                                                                                      |
| GT8A               | Os03 g08600                                 | none                                         |            | 6/4                                | Os02 g09690 (expressed), Os02 g09720 (multidrug resistance 13), Os04 g56120 (receptor-like kinase), Os04 g46040 (hypothetical)                                                                                                           |
| GT8B               | Os03 g20120                                 | none                                         |            | 12/11                              | Os07 g08970 (expressed)                                                                                                                                                                                                                  |
| GT8B               | Os07 g48830                                 | Os07 g48820 (transcription factor)           | 2.9 kb     | 4/4                                |                                                                                                                                                                                                                                          |
| GT8C               | Os03 g18890                                 | Os03 g18900 (mito DNA polymerase)            | 5.4 kb     | 9/9                                |                                                                                                                                                                                                                                          |

| Family | TIGR gene name*    | Antisense gene present                    | Distance   | MPSS, total/unique <sup>†</sup> | Genes MPSS tags hit <sup>‡</sup>                                                                                                                                                                                                                                                                                                                                                                                                                                                                                                             |
|--------|--------------------|-------------------------------------------|------------|---------------------------------|----------------------------------------------------------------------------------------------------------------------------------------------------------------------------------------------------------------------------------------------------------------------------------------------------------------------------------------------------------------------------------------------------------------------------------------------------------------------------------------------------------------------------------------------|
| GT8C   | Os03 g24510        | none                                      |            | 6/6                             |                                                                                                                                                                                                                                                                                                                                                                                                                                                                                                                                              |
| GT8C   | Os02 g50600        | Os02 g50590 (hypothetical)                | 1.0 kb     | 6/6                             |                                                                                                                                                                                                                                                                                                                                                                                                                                                                                                                                              |
| GT8C   | Os06 g13760        | Os06 g13770 (transposon)                  | 4.3 kb     | 4/3                             | Os03 g52794 (phosphatidylinositol 3 & 4 kinase)                                                                                                                                                                                                                                                                                                                                                                                                                                                                                              |
| GT8C   | Os07 g45260        | none                                      |            | 12/11                           | Os08 g11720 (expressed), Os08 g11220 (expressed)                                                                                                                                                                                                                                                                                                                                                                                                                                                                                             |
| GT8C   | Os04 g44850        | none                                      |            | 6/6                             |                                                                                                                                                                                                                                                                                                                                                                                                                                                                                                                                              |
| GT8C   | Os03 g47530        | none                                      |            | 11/10                           | Os04 g41280 (protein binding), Os05 g04660 (expressed)                                                                                                                                                                                                                                                                                                                                                                                                                                                                                       |
| GT8C   | Os10 g31650        | none                                      |            | 2/2                             |                                                                                                                                                                                                                                                                                                                                                                                                                                                                                                                                              |
| GT8D   | Os11 g37980        | Os11 g37970 (win1 precursor)              | 1.8 kb     | 6/5                             | Os08 g04190 (homeobox), Os12 g25220 (retrotransposon)                                                                                                                                                                                                                                                                                                                                                                                                                                                                                        |
| GT8D   | Os06 g49810        | none                                      |            | 3/2                             | over 60 genes                                                                                                                                                                                                                                                                                                                                                                                                                                                                                                                                |
| GT8D   | <b>Os09 g36190</b> | none                                      |            | 15/11                           | <b>Os09 g36180 (GT8D), Os10 g21890 (GT8D)</b> , Os07 g34390 (protein binding), Os11 g38850 (protein kinase)                                                                                                                                                                                                                                                                                                                                                                                                                                  |
| GT8D   | <b>Os10 g21890</b> | none                                      |            | 11/6                            | 30 genes                                                                                                                                                                                                                                                                                                                                                                                                                                                                                                                                     |
| GT8D   | Os04 g54360        | Os04 g54370 (expressed)                   | 0.1 kb     | 4/4                             |                                                                                                                                                                                                                                                                                                                                                                                                                                                                                                                                              |
| GT8D   | <b>Os02 g51130</b> | none                                      |            | 4/2                             | <b>Os06 g12280 (GT8D)</b>                                                                                                                                                                                                                                                                                                                                                                                                                                                                                                                    |
| GT8D   | Os09 g30280        | none                                      |            | 4/4                             |                                                                                                                                                                                                                                                                                                                                                                                                                                                                                                                                              |
| GT8D   | Os02 g29530        | none                                      |            | 8/8                             |                                                                                                                                                                                                                                                                                                                                                                                                                                                                                                                                              |
| GT8D   | Os08 g38740        | none                                      |            | 0/0                             |                                                                                                                                                                                                                                                                                                                                                                                                                                                                                                                                              |
| GT8D   | Os08 g23780        | Os08 g23790 (exopolysaccharuronase)       | 1.1 kb     | 7/7                             |                                                                                                                                                                                                                                                                                                                                                                                                                                                                                                                                              |
| GT8D   | Os06 g51160        | Os06 g51150 (catalase isozyme B)          | 0.3 kb     | 3/2                             | <b>Os10 g21890 (GT8D)</b>                                                                                                                                                                                                                                                                                                                                                                                                                                                                                                                    |
| GT8D   | Os03 g30000        | none                                      |            | 9/8                             | over 30 genes, <b>Os10 g21890 (GT8D)</b>                                                                                                                                                                                                                                                                                                                                                                                                                                                                                                     |
| GT8D   | Os12 g38930        | Os12 g38920 (heparanase-like)             | 0.2 kb     | 7/6                             | Os12 g29220 (MTN3)                                                                                                                                                                                                                                                                                                                                                                                                                                                                                                                           |
| GT8D   | Os11 g03160        | Os11 g03150 (hypothetical)                | 1.1 kb     | 0/0                             |                                                                                                                                                                                                                                                                                                                                                                                                                                                                                                                                              |
| GT8D   | Os12 g02910        | Os12 g02900 (retrotransposon)             | 1.1 kb     | 0/0                             |                                                                                                                                                                                                                                                                                                                                                                                                                                                                                                                                              |
| GT8D   | Os01 g52710        | none                                      |            | 2/2                             |                                                                                                                                                                                                                                                                                                                                                                                                                                                                                                                                              |
| GT8D   | Os03 g11330        | Os03 g11320 (heparanase-like)             | 0.8 kb     | 7/7                             |                                                                                                                                                                                                                                                                                                                                                                                                                                                                                                                                              |
| GT8D   | <b>Os06 g12280</b> | Os06 g12270 (hypothetical)                | 0.8 kb     | 6/4                             | <b>Os02 g51130 (GT8D)</b>                                                                                                                                                                                                                                                                                                                                                                                                                                                                                                                    |
| GT8D   | <b>Os09 g36180</b> | none                                      |            | 2/0                             | <b>Os09 g36190 (GT8D)</b>                                                                                                                                                                                                                                                                                                                                                                                                                                                                                                                    |
| GT8D   | Os03 g21250        | Os03 g21240 (PHR1)                        | 7.4 kb     | 6/6                             |                                                                                                                                                                                                                                                                                                                                                                                                                                                                                                                                              |
| GT8D   | Os05 g40720        | Os05 g40710 (DELLA protein GAI)           | 1.2 kb     | 0/0                             |                                                                                                                                                                                                                                                                                                                                                                                                                                                                                                                                              |
| GT8D   | Os07 g48370        | none                                      |            | 5/3                             | Os02 g26210 (flowering promoting factor), Os02 g26090 (anther-specific APG), Os03 g02050 (nonspecific lipid-transfer), Os04 g23550 (DNA binding), Os07 g06880 (gibberellin receptor), Os10 g41430 (nuc-1), Os12 g13800 (caffeic acid 3-O-methyltransferase), Os02 g36550 (phosphopantothenate-cysteine ligase), Os02 g48190 (expressed), Os03 g28090 (pectinesterase-2), Os03 g48480 (acyl-CoA thioesterase), Os03 g54000 (oligopeptide transporter 3), Os06 g04169 (catalytic/hydrolase), Os09 g04300 (expressed), Os09 g26240 (transposon) |
| GT8E   | Os10 g40640        | Os10 g40650 (holliday junction resolvase) | overlapped | 17/12                           | Os10 g40650 (holliday junction resolvase)                                                                                                                                                                                                                                                                                                                                                                                                                                                                                                    |
| GT8E   | Os04 g46750        | none                                      |            | 3/3                             |                                                                                                                                                                                                                                                                                                                                                                                                                                                                                                                                              |
| GT8E   | Os02 g41520        | Os02 g41530 (hypothetical)                | 2.9 kb     | 4/4                             |                                                                                                                                                                                                                                                                                                                                                                                                                                                                                                                                              |
| GT8E   | Os04 g43700        | none                                      |            | 8/8                             |                                                                                                                                                                                                                                                                                                                                                                                                                                                                                                                                              |

Bold text indicates  $\geq 2$  cell wall genes may share antisense sequences by MPSS tag data.

\*From the TIGR database (<http://rice.plantbiology.msu.edu/>).

<sup>†</sup>From the MPSS database (<http://mpss.udel.edu/>).

<sup>‡</sup>CsIE1 and CsIE6 seem to have transcript assemblies suggesting readthrough of the rRNA methyl transferase.



**Table S5. Real-time PCR primers**

| Real-time PCR primer | Sequence (5' → >3')               | Product size, bp |
|----------------------|-----------------------------------|------------------|
| <i>Hv18 s-F</i>      | AAA CGG CTA CCA CAT CCA AG        | 154              |
| <i>Hv18 s-R</i>      | CCT CCA ATG GAT CCT CGT TA        |                  |
| <i>HvBActin-F</i>    | CTG CGA CAA TGG AAC CGG AAT G     | 150              |
| <i>HvBActin-R</i>    | TGC GCC TCA TCA CCA ACA TAA GC    |                  |
| <i>HvGA3PDH-F</i>    | GAC TCC AAG ACC CTT CTC TTC GGT G | 106              |
| <i>HvGA3PDH-R</i>    | ACT CCA CAA CGT ACT CAG CAC CAG C |                  |
| <i>HvUbi-F</i>       | CGC ACT CTG GCA GAC TAC AAC ATC C | 137              |
| <i>HvUbi-R</i>       | GAG AAC ACC GAC AAC ACA AGA CCT G |                  |
| <i>HvCesA-CR2-F</i>  | CCC TAG GGA CCA TCC TGG           | 187              |
| <i>HvCesA-CR2-R</i>  | GGC ACC ATT TGT CAA CAC           |                  |
| <i>HvCesA6-F</i>     | AAT GGC AAA GGT CCA GAG TG        | 158              |
| <i>HvCesA6-R</i>     | GTT GGG CTG CGG ATA GAG T         |                  |
| <i>HvCsIA-F</i>      | CAG ATC CCC ATG TTC AAC GA        | 115              |
| <i>HvCsIA-R</i>      | GGT CCG TGG AGT CGT CCA G         |                  |
| <i>HvCsIC-F</i>      | GCC GGA GTC ATA TGA AGC AT        | 226              |
| <i>HvCsIC-R</i>      | TGC TTC AGG AGC AAA CAT TG        |                  |
| <i>HvCsIH-F</i>      | GCC AGC TTG ACC CAG TTC AAG AG    | 127              |
| <i>HvCsIH-R</i>      | CGA TGA GAT AGC CAA GGC ATT GC    |                  |
| <i>HvGT8A-F</i>      | ACC CTC AAA CTG CAC ATT CC        | 231              |
| <i>HvGT8A-R</i>      | CCC AGG TAG TGG AGG ACG TA        |                  |
| <i>HvGT8D-F</i>      | GCC ACT CTT TCA GCA GGT TC        | 204              |
| <i>HvGT8D-R</i>      | AAA CAC TGC ACC ATT GAC CA        |                  |

Primers used for real-time PCR were designed using Primer 3 software. Oligonucleotide primers for *HvCesA6*, *HvCesA1*, *HvCesA8*, and *HvCsIF6* genes were described previously [Burton RA, Shirley NJ, King BJ, Harvey AJ, Fincher GB (2004) The *CesA* gene family of barley. Quantitative analysis of transcripts reveals two groups of coexpressed genes. *Plant Physiol* 134:224–236].
